# Supplementary material for: Partners’ experiences of breastfeeding: a qualitative evaluation of a breastfeeding support intervention in Sweden
Source: Springer Nature journal article supplement (doi:10.1186/s13006-023-00609-6), 2024-01-18
Supplement: MOESM1 [file 26640062]

**The evidence-based picture and conversation material for mothers**

**TALKING ABOUT SKIN-TO-SKIN AND  
BREASTFEEDING IN ANTENAL CARE**

The evidence-based picture and conversation material used by midwives during antenatal care: They used empathetic, reflective listening with open-ended questions, reflected and summarised. Healthcare professionals explore what the breastfeeding family already knows about breastfeeding, ask for permission to provide information and offer information.

**Additional file 1.** Supporting information

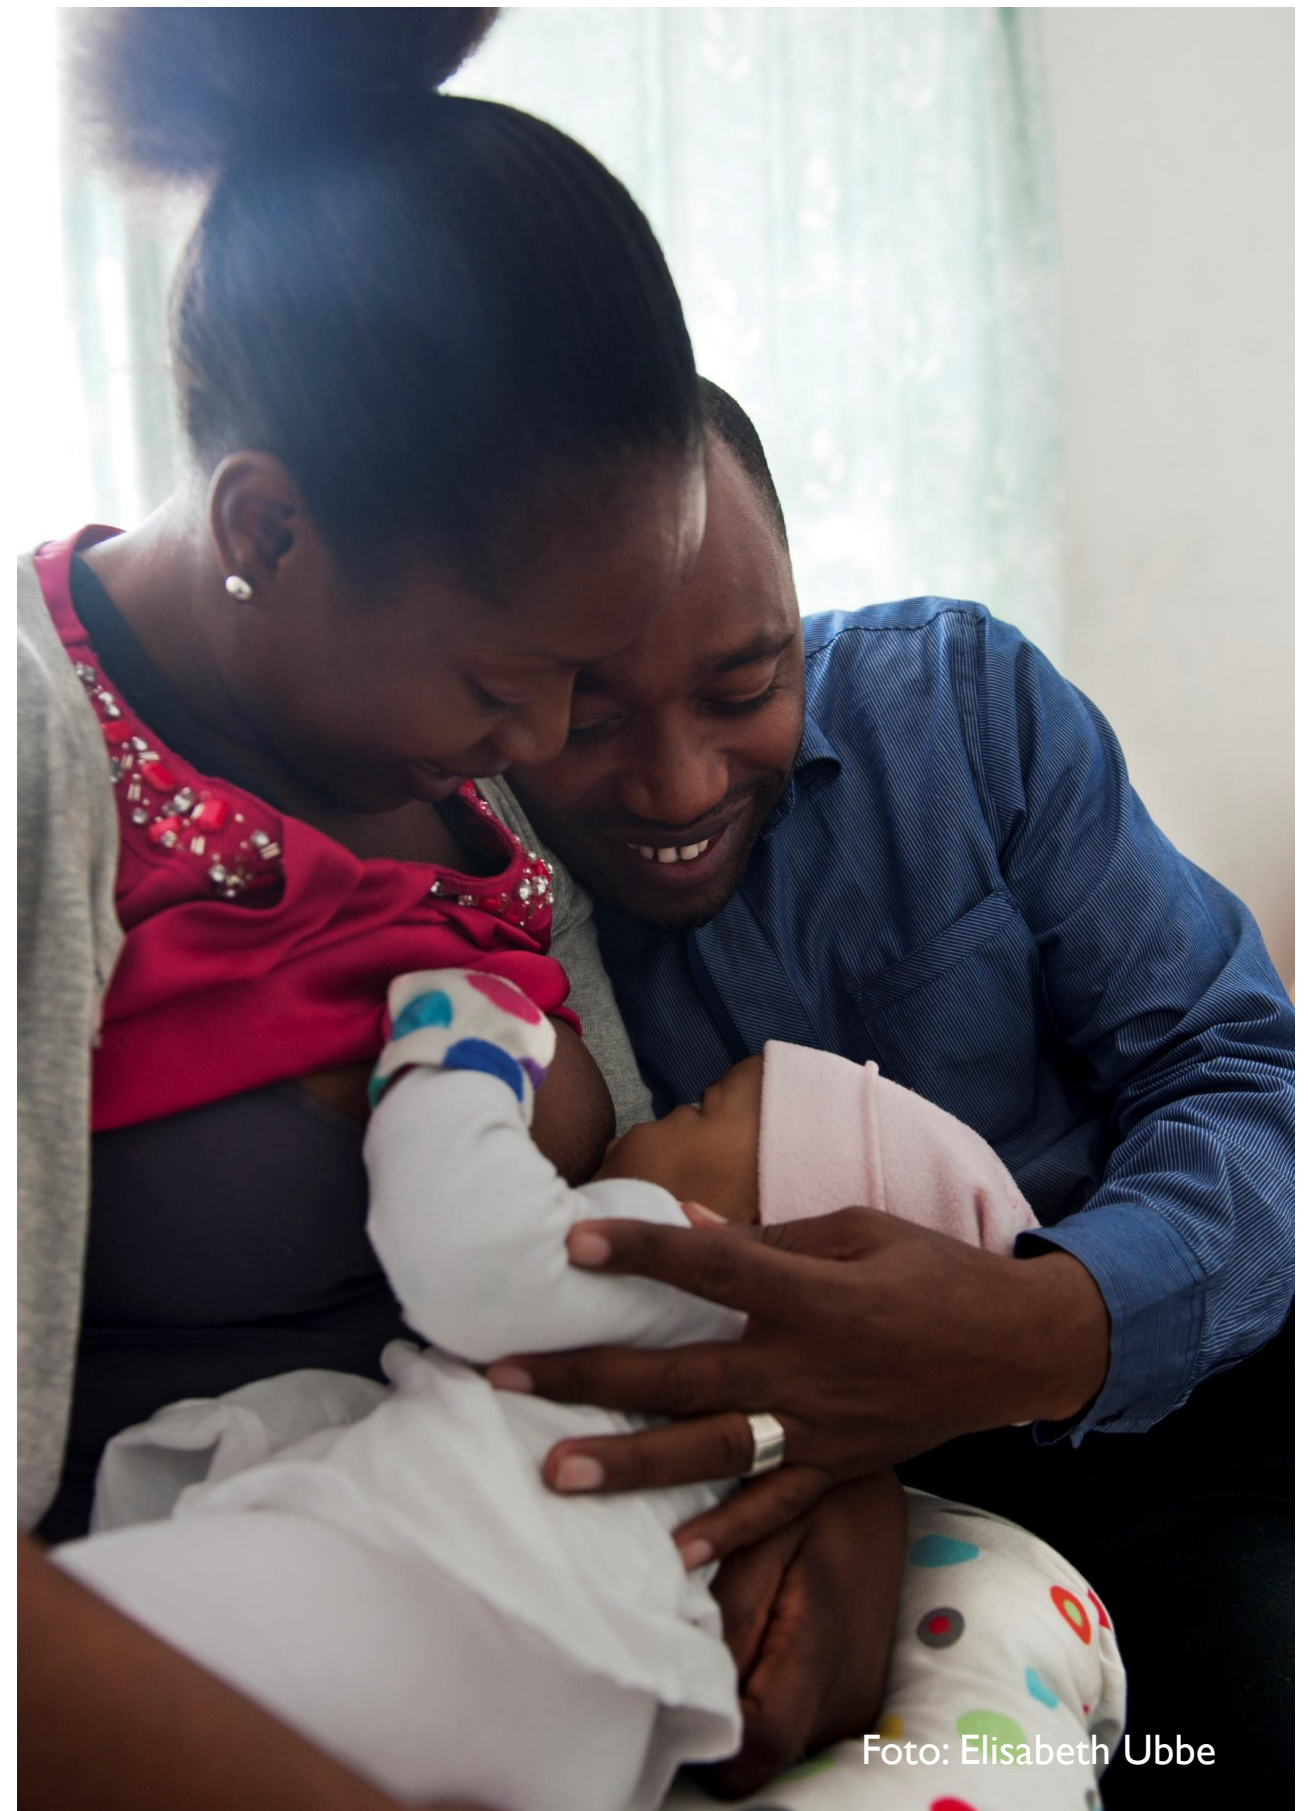

## At the antenatal care visit during pregnancy week 28

- ❖ Health benefits for mother and baby
- ❖ Parents receive the breastfeeding plan, and the midwife fills in where to get help with breastfeeding during the breastfeeding period

## Parents' self-studies

- ❖ The midwife encourages parents to read and fill in the breastfeeding plan together and to watch the short online breastfeeding lectures for parents in the breastfeeding plan before the visit in pregnancy week 32

### HEALTH BENEFITS FOR MOTHER AND BABY

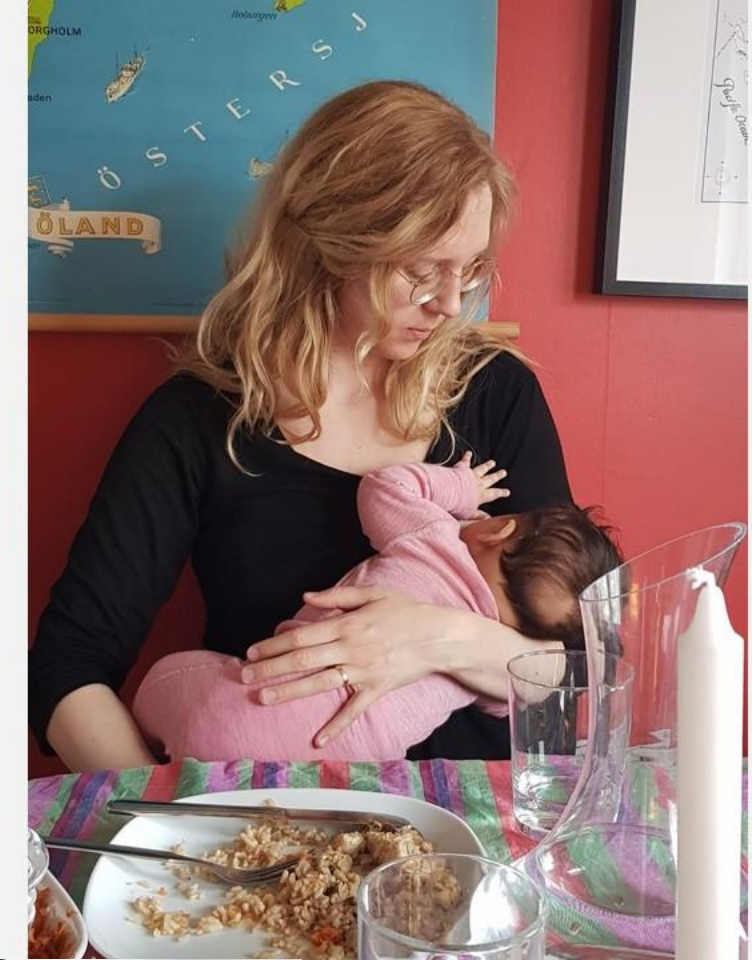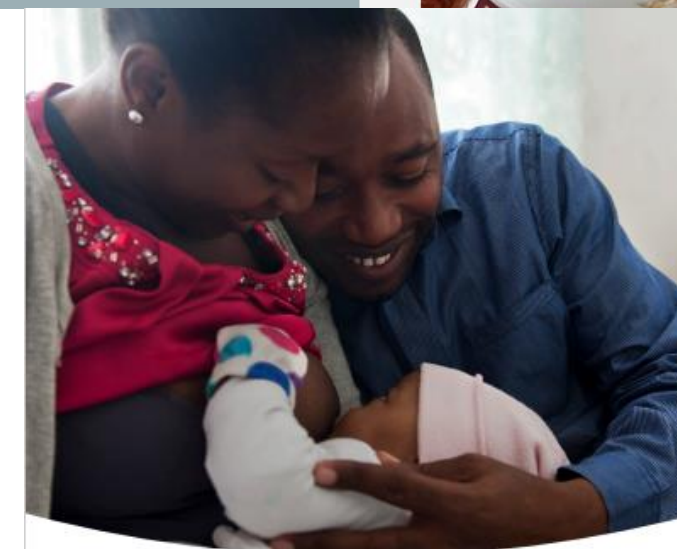

## My/our breastfeeding plan

Antenatal clinic, labour/baby unit (BB) and child healthcare

1177  
VÄRDGUIDEN

REGION  
SÖRMLAND

## **At the antenatal care visit during pregnancy week 32**

- ❖ Skin-to-skin contact and breastfeeding for the first time
- ❖ Go through the breastfeeding plan with parents:
  - Pregnant mothers' intentions
  - Parents' experiences
  - Parents' expectations
  - What kind of breastfeeding support parents want from their family and healthcare professionals

**SKIN TO SKIN  
CONTACT**

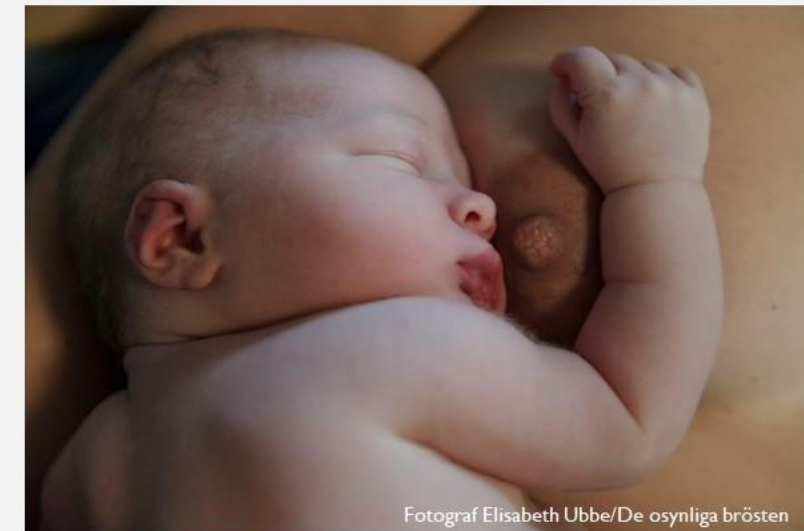

Fotograf Elisabeth Ubbe/De osynliga bröstet

**BREASTFEEDING FOR  
THE FIRST TIME**

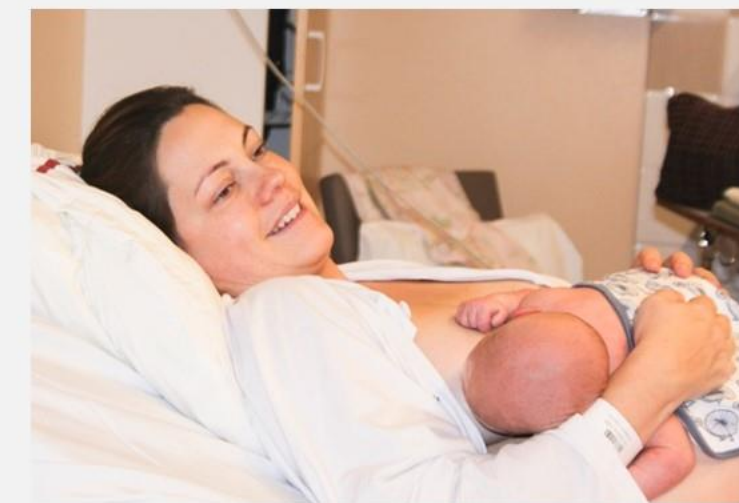

## At the antenatal care visit during pregnancy week 38

- ❖ How to tell when your baby wants to feed, and that breastfeeding is working

**HOW TO TELL YOUR BABY  
WANTS TO FEED**

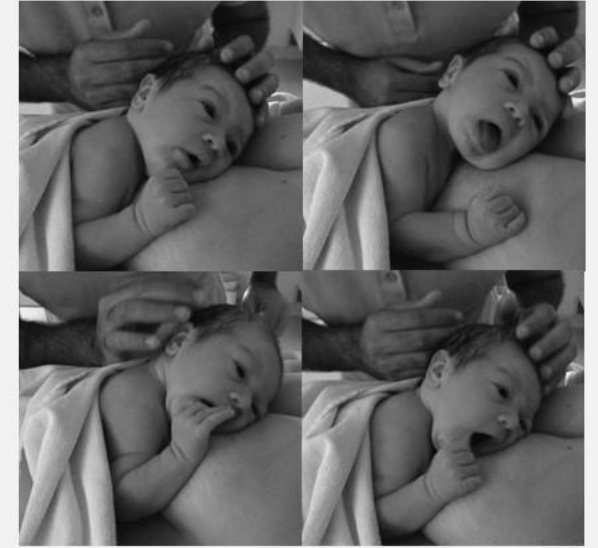

**HOW TO TELL THAT  
BREASTFEEDING IS  
WORKING**

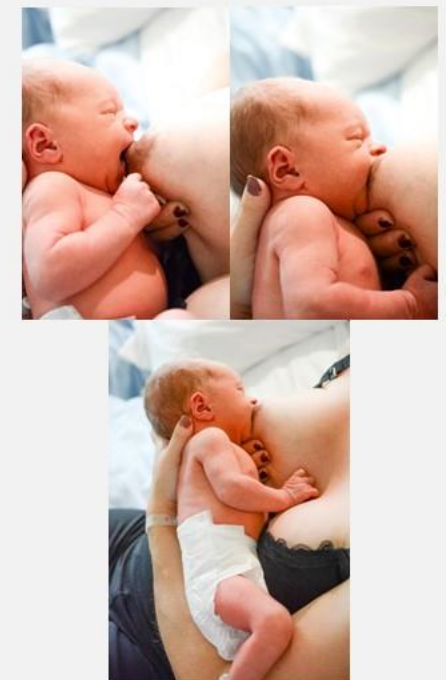

## Follow-up after birth, as well as 2 and 8 weeks after birth

- ❖ Mothers' intentions, parents' experiences and expectations and what kind of breastfeeding support parents want from their family and healthcare professionals
- ❖ If mothers need more breastfeeding support, professionals should help them to contact the breastfeeding outpatient clinic

HOW ARE YOU GETTING ON  
WITH  
BREASTFEEDING/FEEDING?

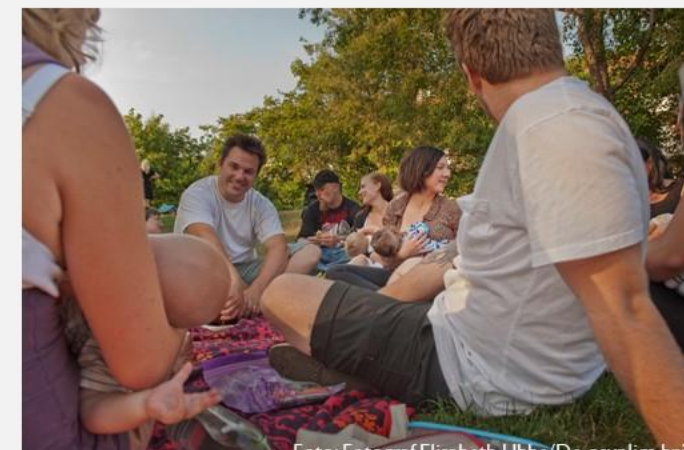

Foto: Fotograf Elisabeth Lihbe/De osynliga brösten

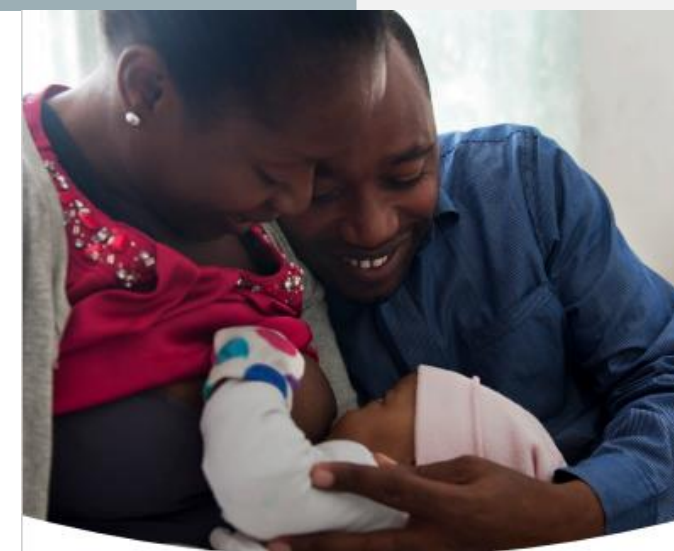

## My/our breastfeeding plan

Antenatal clinic, labour/baby unit (BB) and  
child healthcare

1177  
VÄRDGUIDEN

REGION  
SÖRMLAND

## The evidence-based picture and conversation material at the child health centre

### TALKING ABOUT CONTINUED CLOSENESS AND BREASTFEEDING IN THE CHILD HEALTH CENTRE

The evidence-based picture and conversation material used by child healthcare nurses at the child health centre: They used empathetic, reflective listening with open-ended questions, reflected and summarised. Healthcare professionals explore what the breastfeeding family already knows about breastfeeding, ask for permission to offer information and offer information.

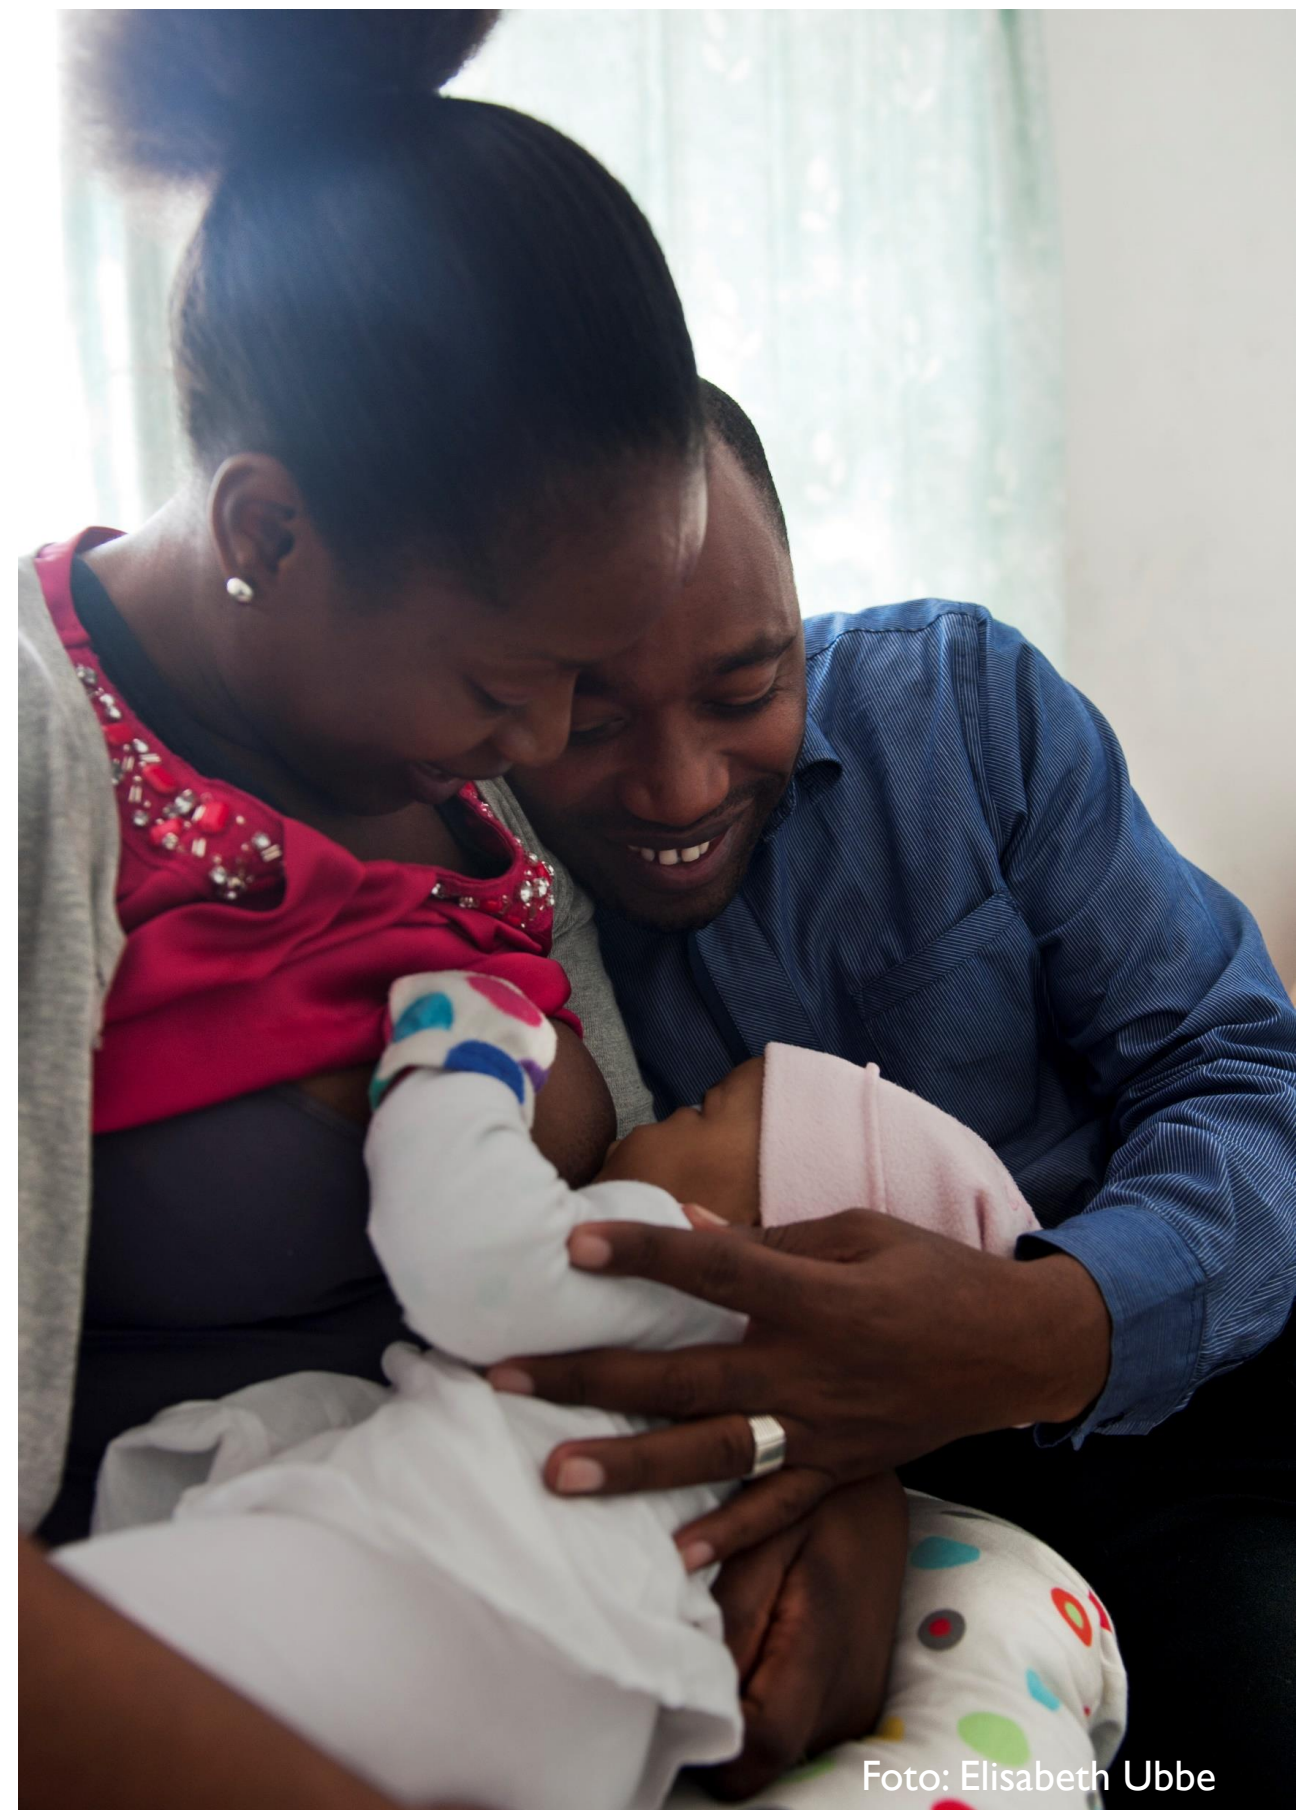

Foto: Elisabeth Ubbe

## Follow-up at every visit during the breastfeeding period

- ❖ Mothers' intentions, parents' experiences and expectations and what kind of breastfeeding support parents want from their family and healthcare professionals
- ❖ If mothers need more breastfeeding support, professionals should help them to contact the breastfeeding outpatient clinic

HOW ARE YOU GETTING ON  
WITH  
BREASTFEEDING/FEEDING?

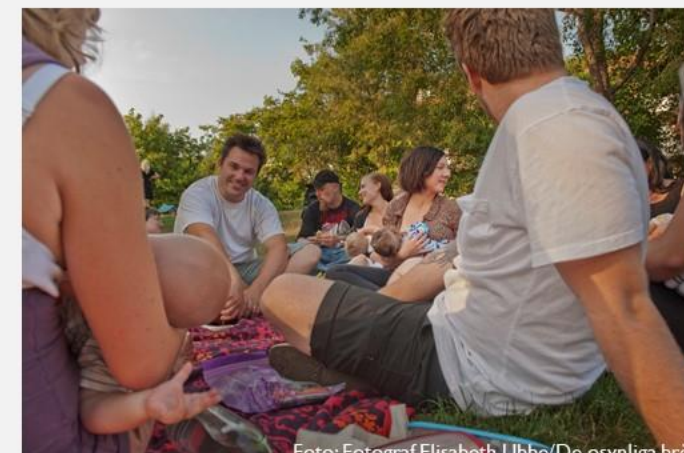

Foto: Fotograf Elisabeth Lihbe/De osynliga brösten



## My/our breastfeeding plan

Antenatal clinic, labour/baby unit (BB) and  
child healthcare

1177  
VÄRDGUIDEN

REGION  
SÖRMLAND

## Two to four weeks after birth

- ❖ Sleep-deprived

## Six to eight weeks after birth

- ❖ Development phases

### SLEEP-DEPRIVED

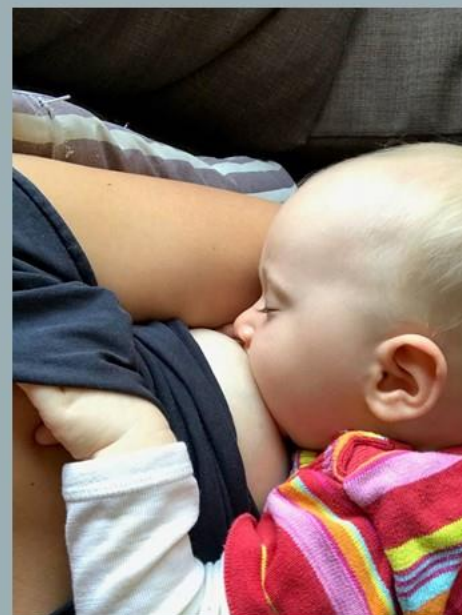

*The milk production hormone is higher at night*

*Mothers who breastfeed in the night fall back to sleep faster and sleep more deeply*

### DEVELOPMENT PHASES

*Your baby will breastfeed more often than before, more times in the night and be fussy at the breast*

*Breastfeeding often and carrying your baby in a sling can help*

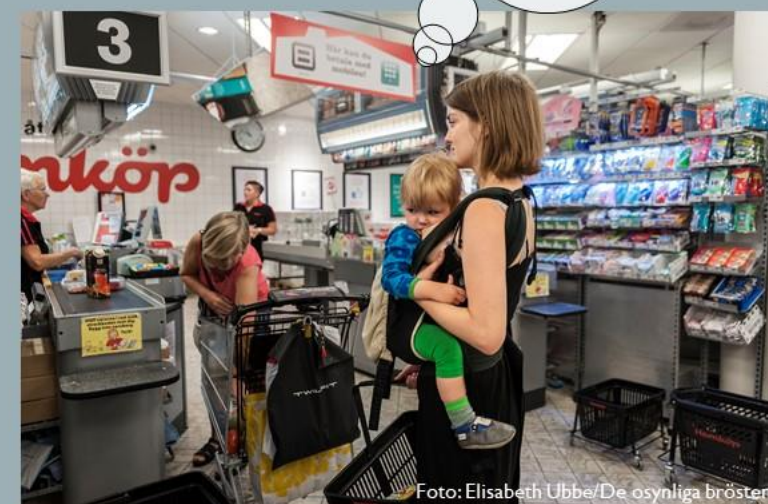



## Breastfeeding plan

Where to get help with breastfeeding during the whole breastfeeding period

Advantages of learning about breastfeeding before the baby is born

Self-studies for parents during pregnancy weeks 28-32: Talk with the partner, family, friends and healthcare professionals about breastfeeding: thoughts, experiences and expectations about breastfeeding

Self-studies for parents during pregnancy weeks 28-32: Talk with the partner, family and healthcare professionals about what kind of support they need from each other, professionals and their family

Self-studies for parents during pregnancy weeks 28-32: Fill in the breastfeeding plan during pregnancy: mothers' intentions about breastfeeding, parents' experiences and expectations and what kind of breastfeeding support parents want from their family and healthcare professionals

Self-studies for parents during pregnancy weeks 32-38: Care routines that can make breastfeeding easier. For example, demand feeding

Self-studies for parents during pregnancy weeks 32-38: Mothers' own breastfeeding plan about breastfeeding after birth

QR-codes for 4 short online breastfeeding lectures for parents in the following languages: Swedish, English, Somali and Arabic-

Are there any benefits of breastfeeding?

How do you know if breastfeeding is working?

How can the mother experience breastfeeding?

How could the mother continue to breastfeed?

For parents who want to know more about breastfeeding: QR-codes for 2 leaflets, only in Swedish:

Breastfeeding - a good start

Breastfeeding and sleeping well

Fill in the breastfeeding plan before visiting the child health centre during the breastfeeding period:

mothers' intentions about breastfeeding, parents' experiences and expectations and what kind of breastfeeding support parents want from their family and healthcare professionals.

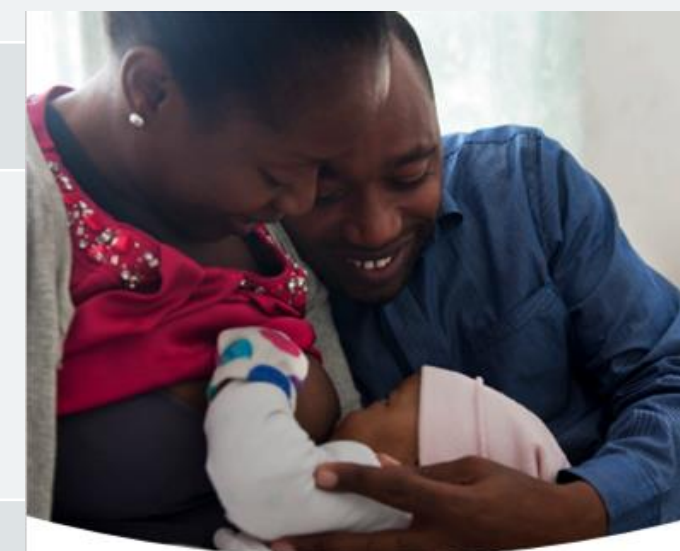

### My/our breastfeeding plan

Antenatal clinic, labour/baby unit (BB) and  
child healthcare
